# Supplementary material for: Cytosol Peroxiredoxin and Cell Surface Catalase Differentially Respond to H2O2 Stress in Aspergillus nidulans
Source: MDPI journal article supplement (doi:10.3390/antiox12071333), 2023-06-23
Supplement: s1 [file s1]

Supplementary Table S1 Strains used in this study

| Strains                              | Genotype                                                                                                                       | Source    |
|--------------------------------------|--------------------------------------------------------------------------------------------------------------------------------|-----------|
| WT                                   | <i>biA1;argB2;pyrG89;wA3;pyroA4</i>                                                                                            | Our Lab   |
| $\Delta catB$                        | <i>biA1;argB2;pyrG89;wA3;pyroA4;\Delta catB::argB</i>                                                                          | Our Lab   |
| $\Delta prxA$                        | <i>biA1;argB2;pyrG89;wA3;pyroA4;\Delta prxA::argB</i>                                                                          | Our Lab   |
| $\Delta catB\Delta prxA$             | <i>biA1;argB2;pyrG89;wA3;pyroA4;</i><br><i>\Delta prxA::argB;\Delta catB::pyrG</i>                                             | This work |
| $\Delta prxA-prxA^{com}$             | <i>biA1;argB2;pyrG89;wA3;pyroA4;</i><br><i>\Delta prxA::argB; \Delta pyrG:: prxA^{com};pyrG</i>                                | This work |
| $\Delta catB-catB^{com}$             | <i>biA1;argB2;pyrG89;wA3;pyroA4;</i><br><i>\Delta catB::argB; \Delta pyrG:: catB^{com};pyrG</i>                                | This work |
| <i>catB-GFP</i>                      | <i>biA1; argB2;pyrG89;wA3;pyroA4;\Delta catB::catB:GFP;pyrG</i>                                                                | This work |
| <i>catB-flag</i>                     | <i>biA1; argB2;pyrG89;wA3;pyroA4;\Delta catB::catB:flag;pyrG</i>                                                               | This work |
| <i>prxA-GFP</i>                      | <i>biA1; argB2;pyrG89;wA3;pyroA4;\Delta prxA::prxA:GFP;pyrG</i>                                                                | This work |
| <i>catB.P-uidA</i>                   | <i>biA1;argB2;pyrG89;wA3;pyroA4;</i><br><i>\Delta pyrG::catB.P:uidA;pyrG</i>                                                   | This work |
| <i>prxA.P-uidA</i>                   | <i>biA1;argB2;pyrG89;wA3;pyroA4;</i><br><i>\Delta pyrG::prxA.P:uidA;pyrG</i>                                                   | This work |
| <i>gpdA.P-DAAO/WT</i>                | <i>biA1;argB2;pyrG89;wA3;pyroA4;</i><br><i>\Delta pyrG::gpdA.P:DAAO;pyrG</i>                                                   | This work |
| <i>gpdA.P-DAAO/\Delta prxA</i>       | <i>biA1;argB2;pyrG89;wA3;pyroA4;</i><br><i>\Delta pyrG::gpdA.P:DAAO;pyrG; \Delta prxA::pyroA</i>                               | This work |
| <i>gpdA.P-DAAO/\Delta catB</i>       | <i>biA1; argB2;pyrG89;wA3;pyroA4;</i><br><i>\Delta pyrG::gpdA.P:DAAO;pyrG; \Delta catB::pyroA</i>                              | This work |
| <i>gpdA.P-DAAO/\Delta\Delta</i>      | <i>biA1; argB2;pyrG89;wA3;pyroA4;</i><br><i>\Delta pyrG::gpdA.P:DAAO;pyrG; \Delta catB::pyroA; \Delta prxA::argB</i>           | This work |
| <i>prxA.P-catB/\Delta\Delta</i>      | <i>biA1;argB2;pyrG89;wA3;pyroA4;</i><br><i>\Delta prxA::argB;\Delta catB.P::pyrG:prxA.P</i>                                    | This work |
| <i>gpdA.P-catB/\Delta\Delta</i>      | <i>biA1;argB2;pyrG89;wA3;pyroA4;</i><br><i>\Delta prxA::argB;\Delta catB.P::pyrG:gpdA.P</i>                                    | This work |
| <i>gpdA.P-catB/WT</i>                | <i>biA1; argB2;pyrG89;wA3;pyroA4;\Delta catB.P::pyrG:gpdA.P</i>                                                                | This work |
| <i>gpdA.P-catB*/WT</i>               | <i>biA1; argB2;pyrG89;wA3;pyroA4;</i><br><i>\Delta catB.P::pyrG:gpdA.P:catB*</i>                                               | This work |
| <i>gpdA.P-catB*/\Delta\Delta</i>     | <i>biA1; argB2;pyrG89;wA3;pyroA4;</i><br><i>\Delta prxA::argB;\Delta catB.P::pyrG:gpdA.P:catB*</i>                             | This work |
| <i>gpdA.P-catB*-GFP/\Delta\Delta</i> | <i>biA1; argB2;pyrG89;wA3;pyroA4;\Delta prxA::argB;</i><br><i>\Delta catB.P::pyrG:gpdA.P:catB*;\Delta catB::catB:GFP;pyroA</i> | This work |
| <i>gpdA.P-prxA/\Delta\Delta</i>      | <i>biA1;argB2;pyrG89;wA3;pyroA4;</i><br><i>\Delta catB::argB;\Delta prxA.P::pyrG:gpdA.P</i>                                    | This work |

*catB\**: *catB* lack of N-signal peptides.

**Supplementary Table S2   Plasmids used in this study**

| <b>Plasmid</b>                        | <b>Source</b> |
|---------------------------------------|---------------|
| pUC19- <i>pyrG</i>                    | Our Lab       |
| pUC- <i>GFP</i>                       | Our Lab       |
| pUC19- <i>GFP-trpC.T-pyrG</i>         | This work     |
| pUC19- <i>GFP-trpC.T-pyroA</i>        | This work     |
| pUC19- <i>pyrG-catB.P-uidA-trpC.T</i> | This work     |
| pUC19- <i>pyrG-prxA.P-uidA-trpC.T</i> | This work     |
| pUC19- <i>pyrG-gpdA.P-uidA-trpC.T</i> | This work     |
| pUC19- <i>prxA<sup>com</sup>-pyrG</i> | This work     |
| pUC19- <i>catB<sup>com</sup>-pyrG</i> | This work     |
| pUC19- <i>pyrG-gpdA.P-DAAO-trpC.T</i> | This work     |

Supplementary Table S3 Primers used for plasmids construction

| Primers                       | Template                                  | Nucleotide sequence (5' to 3')    |
|-------------------------------|-------------------------------------------|-----------------------------------|
| Inverse-1F                    | pUC19- <i>pyrG</i>                        | GGCGTAATCATGGTCATAGC              |
| Inverse-1R                    |                                           | CCTGCAGGTCGACTCTAGAG              |
| <i>GFP</i> -F                 | pUC- <i>GFP</i>                           | GCTATGACCATGATTACGCCGGAGCTGGTGCA  |
| <i>GFP</i> -R                 |                                           | GGCGCTGG                          |
|                               |                                           | CTACACGTGATGATGATGATGATGCATTTTGTA |
|                               |                                           | TAGTTCATCCATGCCATG                |
| <i>trpC</i> .T-1F             | A6 gDNA                                   | ATGCATCATCATCATCATCACGTGTAGTAGTGA |
|                               |                                           | TTTAATAGCTCC                      |
| <i>trpC</i> .T-1R             |                                           | CTCTAGAGTCGACCTGCAGGAAAGAAGGATTA  |
|                               |                                           | CCTCTAAAC                         |
| Inverse-2F                    | pUC19- <i>GFP-trpC</i> .T-<br><i>pyrG</i> | TCTAGAGGATCCCCGGGTAC              |
| Inverse-2R                    |                                           | CTAGAGTCGACCTGCAGGCATG            |
| <i>pyroA</i> -F               | A6 gDNA                                   | CCTGCAGGTCGACTCTAGCGAGCTCGAATTCG  |
|                               |                                           | GATCCAG                           |
| <i>pyroA</i> -R               |                                           | ACCCGGGGATCCTCTAGACTGCAGAAGTGCGC  |
|                               |                                           | GAAAGC                            |
| <i>catB</i> .P-F              | A6 gDNA                                   | CTCTAGAGTCGACCTGCAGGTGTAGAATATCAT |
|                               |                                           | GTAGAG                            |
| <i>catB</i> .P-R              |                                           | GGTTTCTACAGGACGTAACATGGTGAGGTAAA  |
|                               |                                           | GTCAAGATAAAG                      |
| <i>trpC</i> .T-2F             | A6 gDNA                                   | AGCAGGGAGGCAAACAATGATAGTGATTTAAT  |
|                               |                                           | AGCTCCATG                         |
| <i>trpC</i> .T-2R             |                                           | GCTATGACCATGATTACGCCAAAGAAGGATTA  |
|                               |                                           | CCTCTAAAC                         |
| <i>uidA</i> -F                | <i>E. coli</i> BL21                       | ATGTTACGTCCTGTAGAAAC              |
| <i>uidA</i> -R                |                                           | TCATTGTTTGCCCTCCCTGCTG            |
| <i>prxA</i> .P-F              | A6 gDNA                                   | CTCTAGAGTCGACCTGCAGGGGTACGACTTC   |
|                               |                                           | TGGAAAAC                          |
| <i>prxA</i> .P-R              |                                           | GGTTTCTACAGGACGTAACATTGTGTAAGATA  |
|                               |                                           | GTGGTTGTTGG                       |
| <i>gpdA</i> .P-F              | A6 gDNA                                   | CTCTAGAGTCGACCTGCAGGGCTCCTTATTGA  |
|                               |                                           | AGTCGGAG                          |
| <i>gpdA</i> .P-R              |                                           | GGTTTCTACAGGACGTAACATTGTGATGTCTGC |
|                               |                                           | TCAAGCGG                          |
| <i>prxA</i> <sup>com</sup> -F | A6 gDNA                                   | TTGATTTTCGAGCTTATGGTTCC           |
| <i>prxA</i> <sup>com</sup> -R |                                           | TCCTCGATCATCTATTCCCCTGC           |
| <i>catB</i> <sup>com</sup> -F | A6 gDNA                                   | CTTGCTCAGGAGGTTCCGGTTG            |
| <i>catB</i> <sup>com</sup> -R |                                           | CGGTCATGACTCGTTGCTTG              |
| DAAO-F                        | <i>Rhodotorula gracilis</i>               | ATGCACTCCCAGAAGCGCGTC             |
| DAAO-R                        |                                           | TTAGGACTCGCGGGCGGCAC              |

**Supplementary Table S4 Primers used for sgRNA synthesis**

| Primers            | Gene location  | Nucleotide sequence (5' to 3')        |
|--------------------|----------------|---------------------------------------|
| <i>catB</i> -sgF   | <i>catB</i>    | TAATACGACTCACTATAGAGGAGGACCAGTTGCGCTT |
| <i>catB</i> -sgR   |                | TTCTAGCTCTAAAACAAGCGCAACTGGTCCTCCTC   |
| <i>catB</i> .T-sgF | <i>catB</i> .T | TAATACGACTCACTATAGACGCCCGCTAACGAGGACT |
| <i>catB</i> .T-sgR |                | TTCTAGCTCTAAAACAGTCCTCGTTAGCGGGCGTC   |
| <i>prxA</i> .T-sgF | <i>prxA</i> .T | TAATACGACTCACTATAGTATAAGAGGGCACCCTTGT |
| <i>prxA</i> .T-sgR |                | TTCTAGCTCTAAAACACAAGGGTGCCCTCTTATAC   |
| Insert-sgF         | <i>AN9329-</i> | TAATACGACTCACTATAGACACGTCCAGTCCTTACTA |
| Insert-sgR         | <i>AN9328</i>  | TTCTAGCTCTAAAAGTAGTAAGGACTGGACGTGTC   |
| <i>catB</i> .P-sgF | <i>catB</i> .P | TAATACGACTCACTATAGGCAGGGCTCATCAATGTGA |
| <i>catB</i> .P-sgR |                | TTCTAGCTCTAAAAGTCACATTGATGAGCCCTGCC   |

Supplementary Table S5 Primers used for strains construction

| Primer                            | Template                                                               | Nucleotide sequence (5' to 3')                                                                                                      |
|-----------------------------------|------------------------------------------------------------------------|-------------------------------------------------------------------------------------------------------------------------------------|
| Gene Disruption                   |                                                                        |                                                                                                                                     |
| <i>catB</i> -F                    | pUC19- <i>pyrG</i>                                                     | CAGCGCCCTTTACCCGACCTCAAGCCCGACCTCCTCTGCAT<br>TCCTATCCCTCTTTCCATAAAAACCACCAACTTTTATCTTTAT<br>CTTGACTTTACCTCACCGAATTCGATACCTGTGCGAAAG |
| <i>catB</i> -R                    |                                                                        | CAGTGACGATTATAGGACAGTTTGTCAAATTTGAAAATCAA<br>TAAATATAAATATATTATCTATACAGATAAGCTCTCGGCTA<br>CTAGTCTCATTCTACCATTCAAGTGCTTGTCTACCAG     |
| Tagged Expression                 |                                                                        |                                                                                                                                     |
| <i>catB</i> -<br><i>GFP</i> -F    | pUC19- <i>GFP</i> -<br><i>trpC.T-pyrG</i>                              | GTACGTTGCCGATGCCGTGGACGAGAGCTTTGCCAACAACC<br>TCGAGGAGGGTCTGACCGTGTTCAAGTTCTTGGATCGCTTT<br>GCCCTGGACTCGGATGAAGGAGCTGGTGCAGGCGCTGG    |
| <i>catB</i> -<br><i>GFP</i> -R    |                                                                        | ACACATTGCTGTCACTTAAGTTTTGTAAGAATGTGACTGGC<br>ATTCTACCCAAGCACGCGGCGGCAACAAGGGAACCCCGA<br>CACCGCACGAGGTATGTGGGATCAGTGCTTGTCTACCAG     |
| <i>prxA</i> -<br><i>GFP</i> -F    | pUC19- <i>GFP</i> -<br><i>trpC.T-pyrG</i>                              | TGCCATCGTCCTCGACCACGGCAAGGTCACCTACGCTGCTC<br>TGGAGCCCGCCAAGAACCACCTTGAGTTCTCCAGCGCCGA<br>GACTGTCAATCAAGCACCTGGGAGCTGGTGCAGGCGCTGG   |
| <i>prxA</i> -<br><i>GFP</i> -R    |                                                                        | GTGAAACTTAGAGCTCCATTGGGAAATTGGATTGGCAAGA<br>CTGGGCTTGATAGGGCCTGGGTTCCTGTGTTGAATGGAAGTT<br>TTTAGCGCGTCCGCCGCTGGATCAGTGCTTGTCTACCAG   |
| <i>catB</i> -<br><i>flag</i> -F   | pUC19- <i>GFP</i> -<br><i>trpC.T-pyrG</i>                              | GCTTTGCCAACAACCTCGAGGAGGGTCTGACCGTGTTCAAG<br>TTCTTGGATCGCTTTGCCCTGGACTCGGATGAAGATTACAA<br>GGACGACGATGACAAGATGCATCATCATCATCACG       |
| <i>catB</i> -<br><i>flag</i> -R   |                                                                        | ACACATTGCTGTCACTTAAGTTTTGTAAGAATGTGACTGGC<br>ATTCTACCCAAGCACGCGGCGGCAACAAGGGAACCCCGA<br>CACCGCACGAGGTATGTGGGATCAGTGCTTGTCTACCAG     |
| <i>catB</i> *-<br><i>GFP</i> -R   | pUC19- <i>GFP</i> -<br><i>trpC.T-pyroA</i>                             | ACACATTGCTGTCACTTAAGTTTTGTAAGAATGTGACTGGCAT<br>TCCTACCCAAGCACGCGGCGGCAACAAGGGAACCCCGACACC<br>GCACGAGGTATGTGGCTGCAGAAGTGCGCGAAAGC    |
| GUS Expression                    |                                                                        |                                                                                                                                     |
| <i>catB</i> .P-<br><i>uidA</i> -F | pUC19- <i>pyrG</i> -<br><i>catB</i> .P- <i>uidA</i> -<br><i>trpC.T</i> | ACTCCTGTGAAATGAGTATGATGAAGTTGATGGGCAGTGTT<br>TGAATGTGACGGTGACTTATGAATCCCAACCACCATAATAA<br>TAAGACTGCGCAATCTCCTCAGTGCTTGTCTACCAG      |
| <i>catB</i> .P-<br><i>uidA</i> -R |                                                                        | CCTGGTAATGGTCTTCAAAACCTAGCGACTACAGAACGCG<br>AAACTCCTGAAGTATTTGGGTATTTGGGTATGAGAGAGTGC<br>GCCTTGGGGGTGCATGCGCAAAGAAGGATTACCTCTAAAC   |
| <i>prxA</i> .P-<br><i>uidA</i> -F | pUC19- <i>pyrG</i> -<br><i>prxA</i> .P- <i>uidA</i> -<br><i>trpC.T</i> | ACTCCTGTGAAATGAGTATGATGAAGTTGATGGGCAGTGTT<br>TGAATGTGACGGTGACTTATGAATCCCAACCACCATAATAA<br>TAAGACTGCGCAATCTCCTCAGTGCTTGTCTACCAG      |
| <i>prxA</i> .P-<br><i>uidA</i> -R |                                                                        | CCTGGTAATGGTCTTCAAAACCTAGCGACTACAGAACGCG<br>AAACTCCTGAAGTATTTGGGTATTTGGGTATGAGAGAGTGC<br>GCCTTGGGGGTGCATGCGCAAAGAAGGATTACCTCTAAAC   |

| Primer                             | Template                                              | Nucleotide sequence (5' to 3')                                                                                                      |
|------------------------------------|-------------------------------------------------------|-------------------------------------------------------------------------------------------------------------------------------------|
| <b>CatB Overexpression</b>         |                                                       |                                                                                                                                     |
| <i>prxA</i> .P-<br><i>catB</i> -F  | pUC19- <i>pyrG</i> -<br><i>prxA</i> .P- <i>uidA</i> - | CAGGTCCCCAACCCTCATCAGACCATAATTACTGATAGCC<br>AAGCAGATCGCCTGCTCGGCACCACCTGCTTAACCCCGAAT<br>AAGACATCGCTCCGAGCGTCAGTGCTTGTCTACCAG       |
| <i>prxA</i> .P-<br><i>catB</i> -R  | <i>trpC</i> .T                                        | TAGCATCGGGGTTGGTATCGCGACGGCCGAGCTCGCCTGTC<br>ATATACGGACAGACGGCATTGGCGACGCCAACAAGGCCGA<br>CCAGGCCGAGAGCTCGCATTGTGTAAGATAGTGGTTGTTG   |
| <i>gpdA</i> .P-<br><i>catB</i> -F  | pUC19- <i>pyrG</i> -<br><i>gpdA</i> .P- <i>uidA</i> - | CAGGTCCCCAACCCTCATCAGACCATAATTACTGATAGCC<br>AAGCAGATCGCCTGCTCGGCACCACCTGCTTAACCCCGAAT<br>AAGACATCGCTCCGAGCGTCAGTGCTTGTCTACCAG       |
| <i>gpdA</i> .P-<br><i>catB</i> -R  | <i>trpC</i> .T                                        | TAGCATCGGGGTTGGTATCGCGACGGCCGAGCTCGCCTGTC<br>ATATACGGACAGACGGCATTGGCGACGCCAACAAGGCCGA<br>CCAGGCCGAGAGCTCGCATTGTGATGTCTGCTCAAGCGG    |
| <i>gpdA</i> .P-<br><i>catB</i> *-F | pUC19- <i>pyrG</i> -<br><i>gpdA</i> .P- <i>uidA</i> - | CAGGTCCCCAACCCTCATCAGACCATAATTACTGATAGCC<br>AAGCAGATCGCCTGCTCGGCACCACCTGCTTAACCCCGAAT<br>AAGACATCGCTCCGAGCGTCAGTGCTTGTCTACCAG       |
| <i>gpdA</i> .P-<br><i>catB</i> *-R | <i>trpC</i> .T                                        | TGGGCCCGCCGACGTCAGTCGTCAGGTACGAGTCCGTGTCTG<br>CAAGGTAGTACTCGGACAGAAATTCCTCAGTGGCCTCGGTA<br>GCATCGGGGTTGGTATCCATTGTGATGTCTGCTCAAGCGG |
| <b>PrxA Overexpression</b>         |                                                       |                                                                                                                                     |
| <i>gpdA</i> .P-<br><i>prxA</i> -F  | pUC19- <i>pyrG</i> -<br><i>gpdA</i> .P- <i>uidA</i> - | CTCGACGGTCTTTCTTGATAATACAGGCGGCGAATCATCGA<br>AAGGATTCGTTTCGGCATCCTTCTGCTTCGGATCACCTCACT<br>ACGGAGTATGGATGGCGCTCAGTGCTTGTCTACCAG     |
| <i>gpdA</i> .P-<br><i>prxA</i> -R  | <i>trpC</i> .T                                        | TCAATTGTACTAATAAGAATTTAGAGCAACATACGAGAAGAC<br>AACGTCAGCGGGGAAGCTGTCACCGGCCTTAAGTCCAGACAT<br>TGTGATGTCTGCTCAAGCGG                    |

**Supplementary Table S6 Primers used for strains verification**

| <b>Primers</b>          | <b>Gene location</b> | <b>Nucleotide sequence (5' to 3')</b> |
|-------------------------|----------------------|---------------------------------------|
| <i>pyrG</i> -check-5'-R | <i>pyrG</i>          | TAGGAGAGACCCGTGTTCCG                  |
| <i>pyrG</i> -check-3'-F | <i>pyrG</i>          | CTCACTGACGGCTCTAGTAG                  |
| <i>catB</i> .P-1F       | <i>catB</i> .P       | CGTCGAGACTGGTTGTATATCC                |
| <i>catB</i> -1F         | <i>catB</i>          | CCACCAAGCTCGTCAAGTTCC                 |
| <i>catB</i> -1R         | <i>catB</i>          | AGAGGGTTGAGCTGGAGTTGG                 |
| <i>catB</i> .T-1R       | <i>catB</i> .T       | CGGTCATGACTCGTTGCTTG                  |
| <i>prxA</i> .P-1F       | <i>prxA</i> .P       | CTATTAAGGATACGTCTGGCG                 |
| <i>prxA</i> -1F         | <i>prxA</i>          | CCCCGCTGACGTTGTCTTC                   |
| <i>prxA</i> -1R         | <i>prxA</i>          | GGTCGAGGACGATGGCATAAC                 |
| <i>prxA</i> .T-1R       | <i>prxA</i> .T       | GCTCTAGCCCTCAATCTCCTC                 |
| <i>AN9329</i> -1F       | <i>AN9329</i>        | TCGACTGGCCTAAAGTCCCTG                 |
| <i>uidA</i> -1F         | <i>uidA</i>          | ACAGCGAAGAGGCAGTCAACG                 |
| <i>AN9328</i> -1R       | <i>AN9328</i>        | GCTGGCTAGTTCCGTCTTCTC                 |
| <i>catB</i> -2R         | <i>catB</i>          | GGCCTTGAGACTCTGCTGG                   |
| <i>catB</i> *-1F        | <i>catB</i>          | TCCGTATATGACAGGCGAGC                  |
| <i>catB</i> -3R         | <i>catB</i>          | GGAACCTGACGAGCTTGGTGG                 |
| <i>gpdA</i> .P-1F       | <i>gpdA</i> .P       | CGAGATAGTACCTTCTCCG                   |
| DAAO-1R                 | DAAO                 | CTCGACCCACTTCTTGAAG                   |

**Supplementary Table S7 Primers used for probe synthesis**

| <b>Primers</b>       | <b>Probe</b> | <b>Nucleotide sequence (5' to 3')</b> |
|----------------------|--------------|---------------------------------------|
| <i>uidA</i> -probe-F | <i>uidA</i>  | CCTGTGGGCATTTCAGTCTGG                 |
| <i>uidA</i> -probe-R | <i>uidA</i>  | CTTCACTGCCACTGACCGGATG                |
| <i>catB</i> -probe-F | <i>catB</i>  | GCCGTACTTGCTTCTGTTGAC                 |
| <i>GFP</i> -probe-R  | <i>GFP</i>   | TCTTCGATGTTGTGGCGGGTC                 |
| <i>prxA</i> -probe-F | <i>prxA</i>  | ACTGAGGAGAAGGGCGAGATC                 |



**Supplementary Table S8 Primers used for Q-RT-PCR**

| <b>Primers</b>     | <b>Gene</b> | <b>Nucleotide sequence (5' to 3')</b> |
|--------------------|-------------|---------------------------------------|
| RT- <i>actA</i> -F | <i>actA</i> | GAAGTCCTACGAACTGCCTGATG               |
| RT- <i>actA</i> -R |             | GACCAAGAACGCTGGGCTGG                  |
| RT- <i>catB</i> -F | <i>catB</i> | CAACCCCGATGCTACCGAG                   |
| RT- <i>catB</i> -R |             | GGCCTTGAGACTCTGCTGG                   |
